# Supplementary material for: Amplification-free CRISPR/Cas based dual-enzymatic colorimetric nucleic acid biosensing device
Source: Royal Society of Chemistry journal article supplement (doi:10.1039/d4lc01039f), 2025-01-01
Supplement: d4lc01039f1.pdf [file d4lc01039f1.pdf]

## Electronic Supporting Information

### Amplification-free CRISRP/Cas Based Dual-enzyme Colorimetric

### Nucleic Acid Biosensing Device

*Guodong Tong<sup>1</sup>, Pabitra Nath<sup>2</sup>, Yuki Hiruta<sup>1</sup>, Daniel Citterio<sup>1\*</sup>*

<sup>1</sup> *Department of Applied Chemistry, Faculty of Science and Technology, Keio University, 3-14-1 Hiyoshi, Kohoku-ku, Yokohama, Kanagawa 223-8522, Japan.*

<sup>2</sup> *Department of Physics Tezpur University, Napaam, Sonitpur, 784028 Assam, India.*

## Table of Contents

|                                                                                                                                  |     |
|----------------------------------------------------------------------------------------------------------------------------------|-----|
| Synthesis and characterization of PMBA .....                                                                                     | S3  |
| Investigating the influence of PVA residues on the enzymatic Cas and ALP reactions .....                                         | S4  |
| <b>Table S1</b> Sequences of nucleic acids used in this work.....                                                                | S5  |
| <b>Table S2</b> Molecular weight of PMBA .....                                                                                   | S6  |
| <b>Fig. S1</b> NMR chart for PMBA.....                                                                                           | S7  |
| <b>Fig. S2</b> Sketches and detailed scale for each component of the 3D-printed device .....                                     | S8  |
| <b>Fig. S3</b> PVA membrane molding platform.....                                                                                | S9  |
| <b>Fig. S4</b> Sketches and detailed scale for each component of the smartphone accessory.....                                   | S10 |
| <b>Fig. S5</b> Optical path scheme for smartphone-based signal detection. ....                                                   | S11 |
| <b>Fig. S6</b> Screenshot of the app used during smartphone-based signal detection .....                                         | S12 |
| <b>Fig. S7</b> TEM images and DLS data of synthesized AuNPs.....                                                                 | S13 |
| <b>Fig. S8</b> Sketch and detailed scale for the probe stick.....                                                                | S14 |
| <b>Fig. S9</b> XPS charts for probe sticks after AuNP (13 nm) immobilization .....                                               | S15 |
| <b>Fig. S10</b> Probe sticks coated with different concentrations of AuNPs solution. ....                                        | S16 |
| <b>Fig. S11</b> Absorbance after dual enzymatic reaction .....                                                                   | S17 |
| <b>Fig. S12</b> Absorbance after dual enzymatic reaction for different reaction time.....                                        | S18 |
| <b>Fig. S13</b> Influence of PVA residues on CRISPR/Cas reaction and ALP reaction .....                                          | S19 |
| <b>Fig. S14</b> Comparison of the S/N ratio between results recorded with a microplate reader and with the smartphone setup..... | S20 |
| <b>Reference:</b> .....                                                                                                          | S20 |

## Experimental methods

### Synthesis and characterization of PMBA

PMBA was synthesized as previously reported.<sup>1</sup> A solution of 2-aminoethyl methacrylate hydrochloride (AEMA-HCl) (12.1 mmol) and trimethylamine (24.2 mmol) was prepared in chloroform (40 mL). Di-tert-butyl dicarbonate (13.3 mmol) was added to this mixture, and the reaction was carried out at 40 °C overnight. Upon completion, ethyl acetate (60 mL) was added, and resulting precipitate was removed by filtration. The filtrate was evaporated under vacuum to dryness, and the residue was washed three times with water, followed by freeze-drying overnight, yielding 78% of the Boc-protected AEMA.

MMA (54.8 mmol), Boc-AEMA (6.09 mmol) and AIBN (0.122 mmol) were dissolved in ethyl acetate (30.6 mL). 1, 3, 5-Trioxane (10 mmol) was added as a reference and the conversion rate was 91.9%. Oxygen was removed by nitrogen bubbling before polymerization, which was carried out overnight at 70 °C. The resulting copolymer was precipitated by dropping it into 1000 mL of n-hexane, followed by drying under vacuum overnight. NMR analysis was performed on a JNM ECA-500 (JEOL, Japan). The peaks and integral value was consistent with the previous work.

The weight-average molecular weight ( $M_w$ ) and number average molecular weight ( $M_n$ ) of the polymers were determined using a GPC system (Prominence, CMB-20A system controller, DGU-20A3R degasser, LC-20AR pump, SIL-20A-CHT autosampler, RID-20A refractive index detector, and CTO-20AC column oven; Shimadzu, Kyoto, Japan). The columns used were a TSKgel guard column  $\alpha$  and two TSKgel $\alpha$ -M columns (TOSOH, Tosoh, Japan) connected in series. The mobile phase was DMF containing 10 mM LiBr, used as eluent at a flow rate of 0.7 mL min<sup>-1</sup> at 40 °C. The weight-average molecular weight ( $M_w$ ) and polydispersity ( $M_w/M_n$ ) of the synthesized polymer are shown in Table S2.

## Investigating the influence of PVA residues on the enzymatic Cas and ALP reactions

A PVA membrane was added to 300  $\mu\text{L}$  of NE buffer and incubated for 1h. A solution was prepared with the following final concentrations: Cas enzyme = 50 nM, crRNA = 100 nM, target DNA = 1 nM, and FQ reporter = 1000 nM (6-FAM-TTATT-IABkFQ, purchased from IDT). Here, the FQ reporter was used as a substitute for the AuNPs-ssDNA-ALP probe. After the activation of the Cas enzyme, the single-stranded DNA connecting the quencher and the fluorophore was cleaved, turning on the fluorescence emission of 6-FAM at 520 nm when excited by a 495 nm light source. Similarly, 100  $\mu\text{l}$  of 1  $\mu\text{g}/\text{mL}$  ALP solutions with and without PVA were prepared, followed by adding 20  $\mu\text{L}$  of BCIP/NBT substrate. After a 10-minute reaction, the absorbance at 580 nm for the two situations was compared.

**Table S1** Sequences of nucleic acids used in this work

| Oligo            | Sequence(5'-3')                                               |
|------------------|---------------------------------------------------------------|
| Target DNA       | AAAAAAAAAATCATGTAACGTTCTATGATTTACACTCCATGGT                   |
|                  | TTTTTTTTTTAGTACATTGCAAGATACTAAATGTGAGGTACCA                   |
| 1 mismatched DNA | AAAAAAAAAATCATGT <b>C</b> ACGTTCTATGATTTACACTCCATGGT          |
|                  | TTTTTTTTTTAGTACA <b>G</b> TGCAAGATACTAAATGTGAGGTACCA          |
| 2 mismatched DNA | AAAAAAAAAATCATGT <b>C</b> ACGT <b>G</b> CTATGATTTACACTCCATGGT |
|                  | TTTTTTTTTTAGTACA <b>G</b> TGCA <b>C</b> GATACTAAATGTGAGGTACCA |
| crRNA            | UAAUUUCUACUAAGUGUAGAUGUACAUUGCAAGAUACUAAA                     |
| ssDNA 30 base    | BiosG-(TTA) <sub>10</sub> -ThioMC6-D                          |
| ssDNA 100 base   | BiosG-(TTA) <sub>33</sub> T-ThioMC3-D                         |

**Table S2** Molecular weight of PMBA

| Mn    | Mw    | Mw/Mn |
|-------|-------|-------|
| 43369 | 92532 | 2.13  |

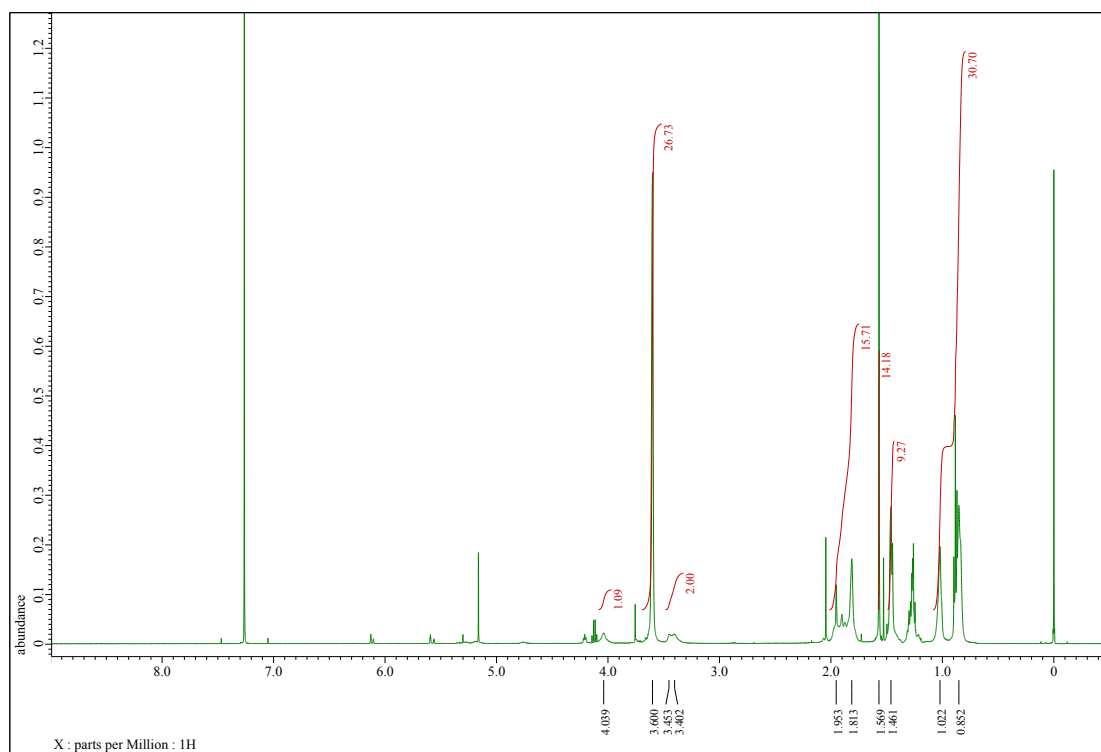

**Fig. S1** NMR chart for PMBA

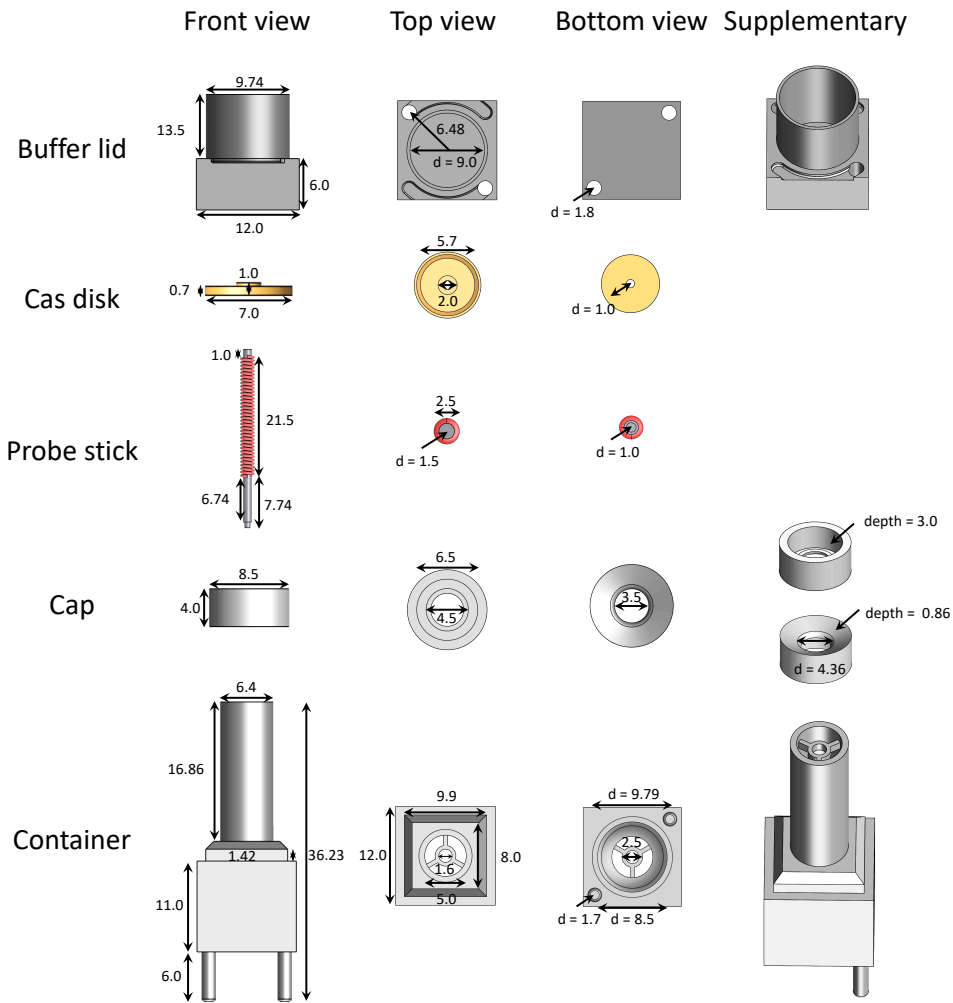

**Fig. S2** Sketches and detailed scale for each component of the 3D-printed device (units: mm).



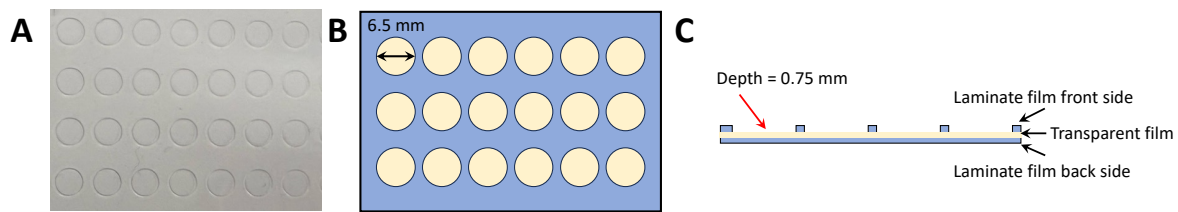

**Fig. S3** (A) PVA membrane molding platform, (B) top view scale, and (C) cross-sectional view.

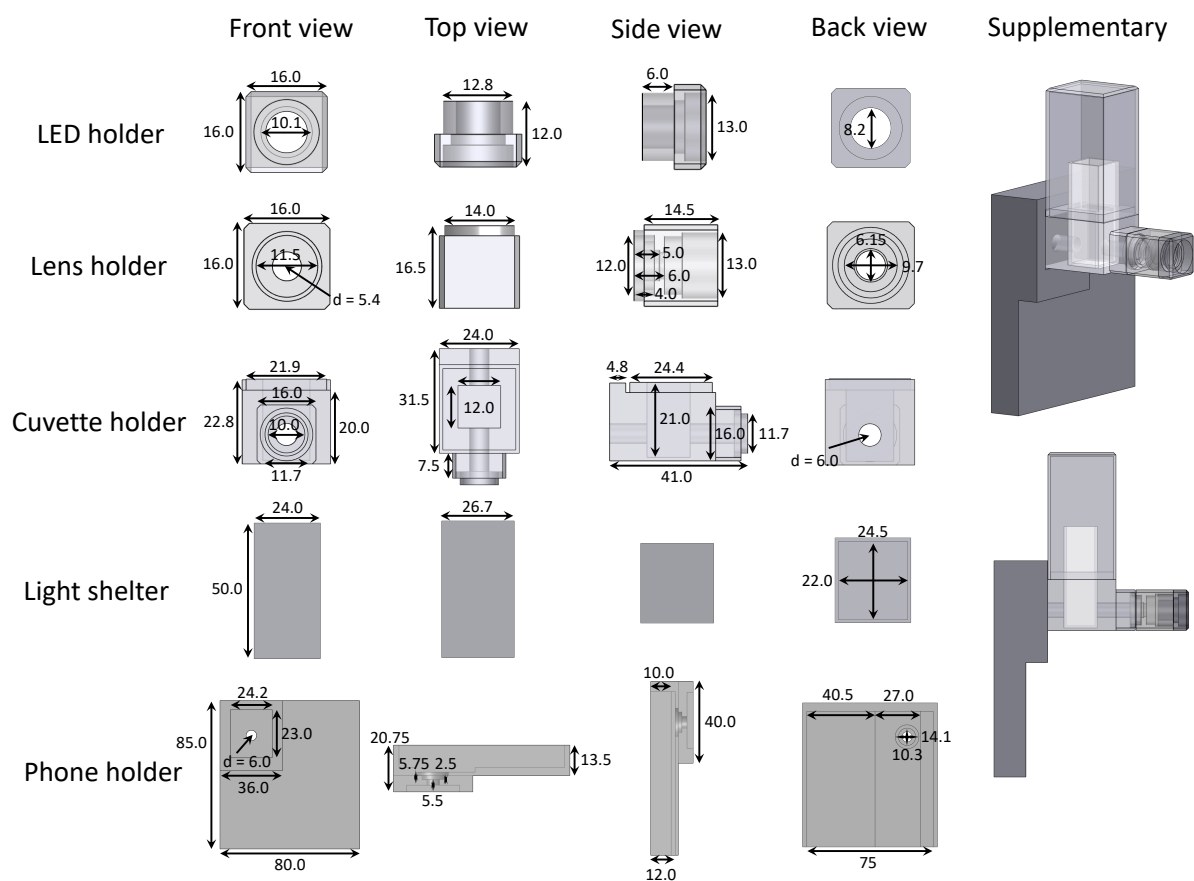

**Fig. S4** Sketches and detailed scale for each component of the smartphone accessory (units: mm).

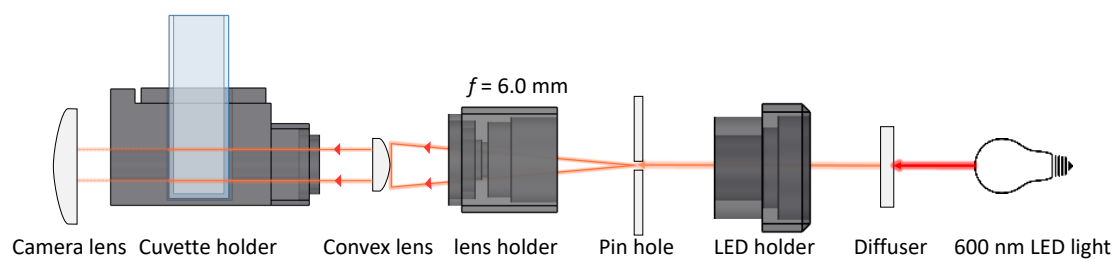

**Fig. S5** Optical path scheme for smartphone-based signal detection.

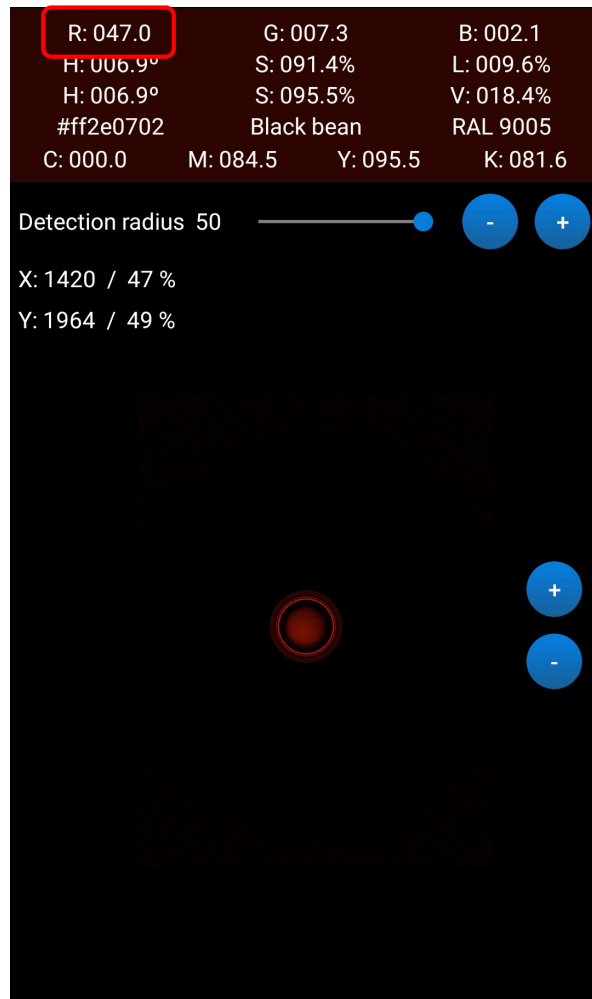

**Fig. S6** Screenshot of the app used during smartphone-based signal detection; R represents the red intensity.

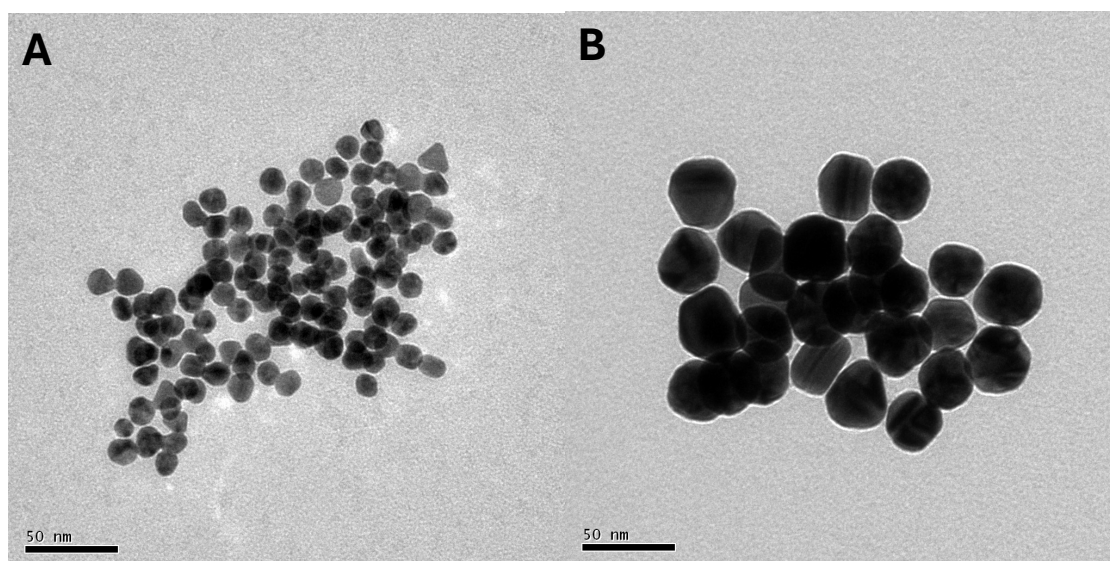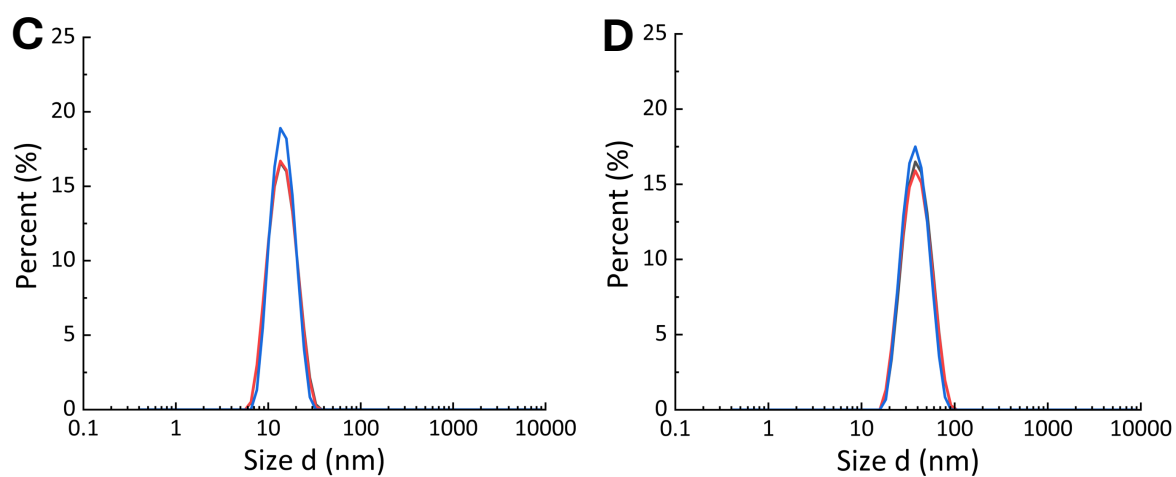

**Fig. S7** TEM images of synthesized AuNPs: (A) 13 nm and (B) 30 nm diameter particles. Hydrodynamic particle size distribution by intensity of synthesized AuNPs: (C) 13 nm (Z-average: 13.44 nm, PDI: 0.118), and (D) 30 nm (Z-average: 34.31 nm, PDI: 0.144) diameter particles; the different color traces represent the results of 3 repeated measurements.

Details of Probe Stick

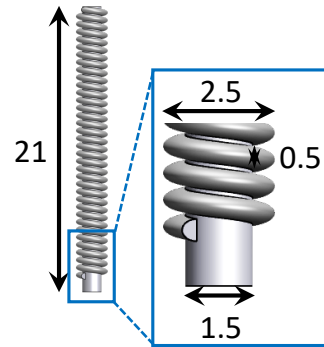

**Fig. S8** Sketch and detailed scale for the probe stick, the blue frame shows a zoomed-in section (units: mm).

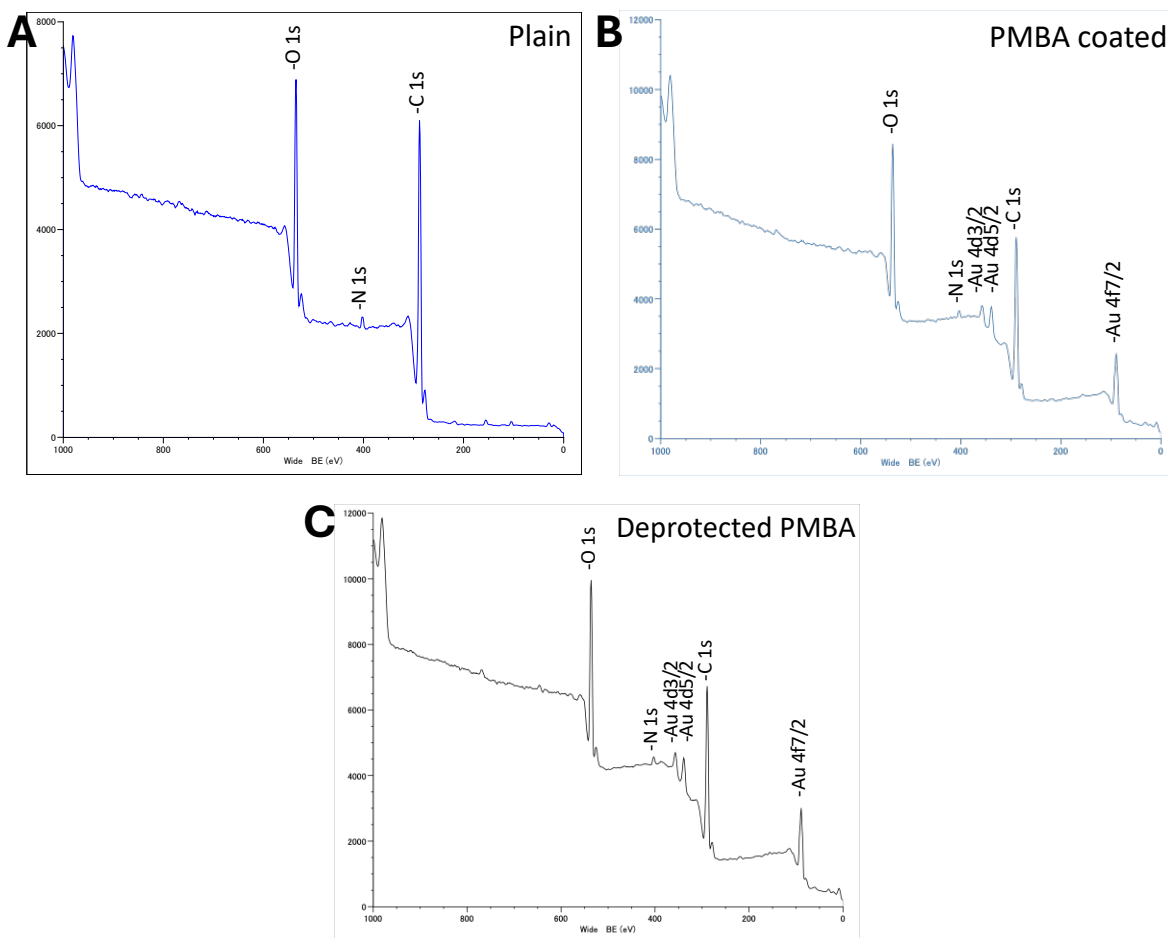

**Fig. S9** XPS charts for probe sticks after AuNP (13 nm) immobilization onto: (A) plain probe stick, (B) PMBA coated probe stick, and (C) deprotected PMBA coated probe stick.

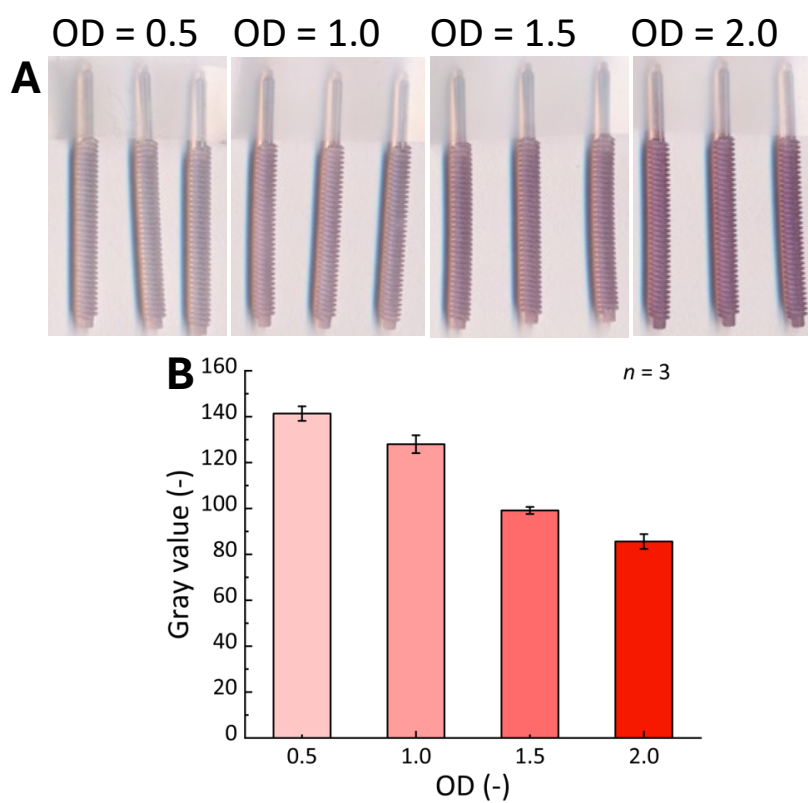

**Fig. S10** Scanned images (A) and gray values (B) for probe sticks coated with different concentrations of 13 nm AuNPs solution.



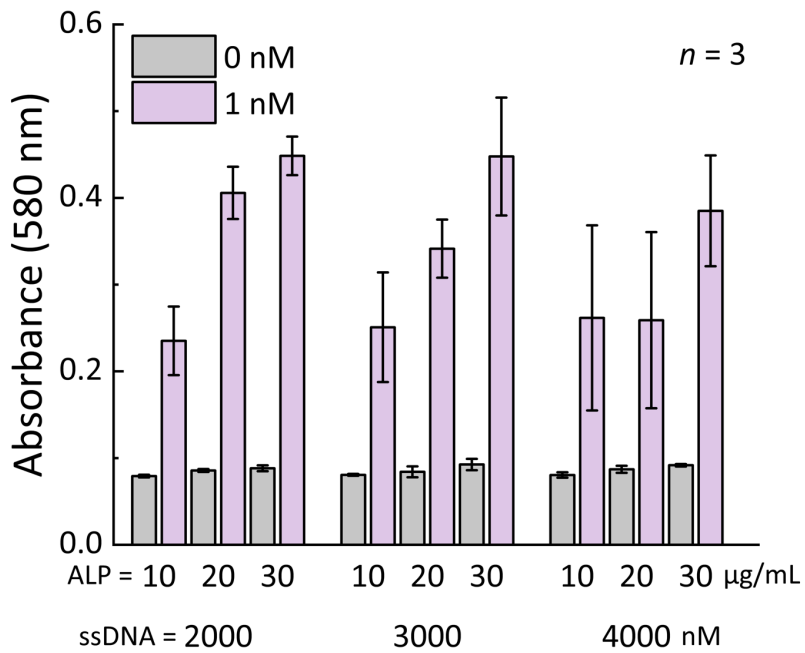

**Fig. S11** Absorbance after dual enzymatic reaction (trans cleavage reaction: 30min, ALP reaction: 30min) of probe sticks with samples in the absence (0 nM) or presence (1 nM) of target DNA, when using different concentrations of ssDNA and ALP for probe stick modification.

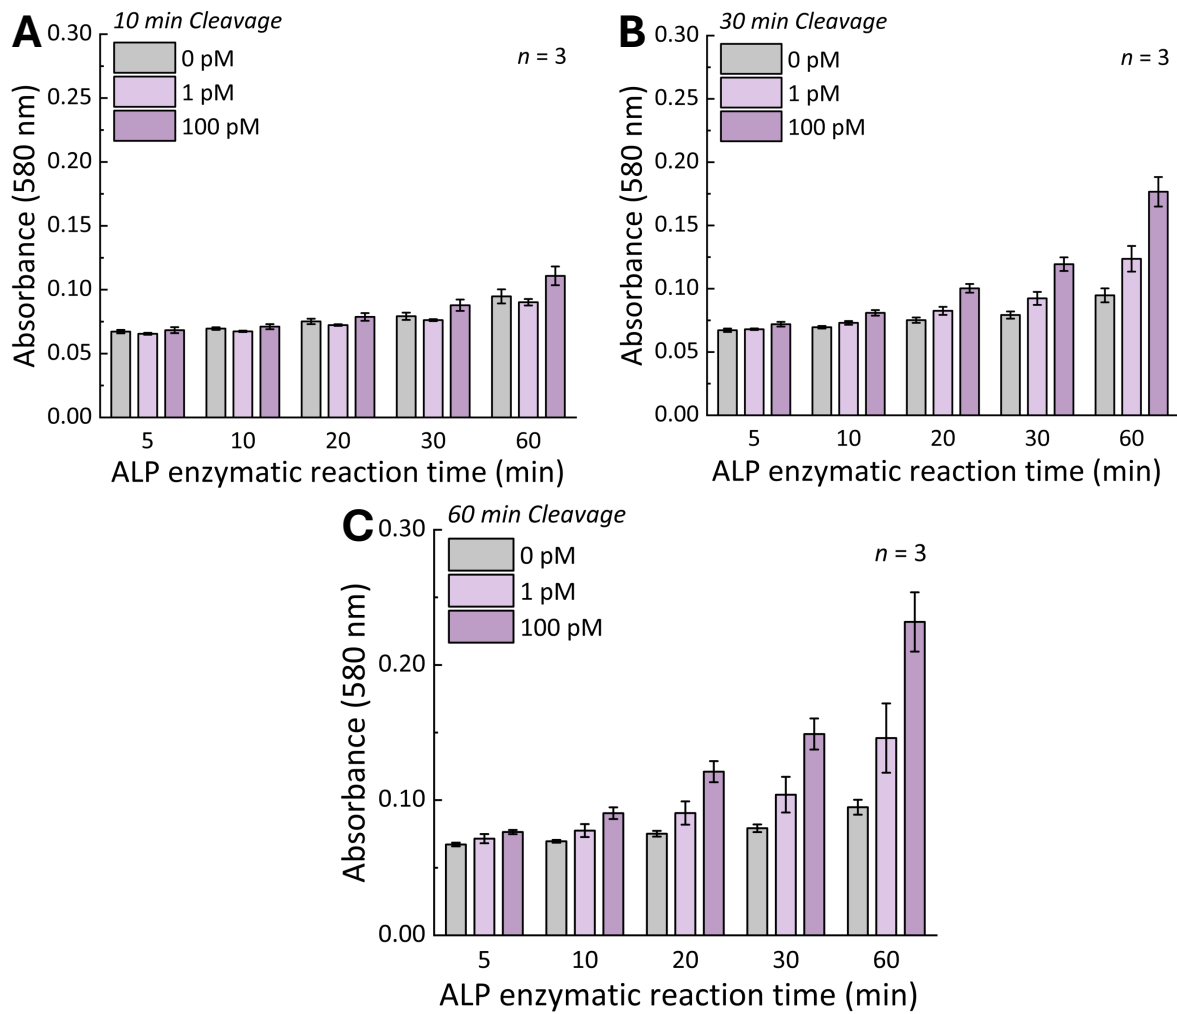

**Fig. S12** Absorbance after dual enzymatic reaction for different reaction time combinations: (A) 10 min trans cleavage time, (B) 30min trans cleavage time, and (C) 60 min trans cleavage time.

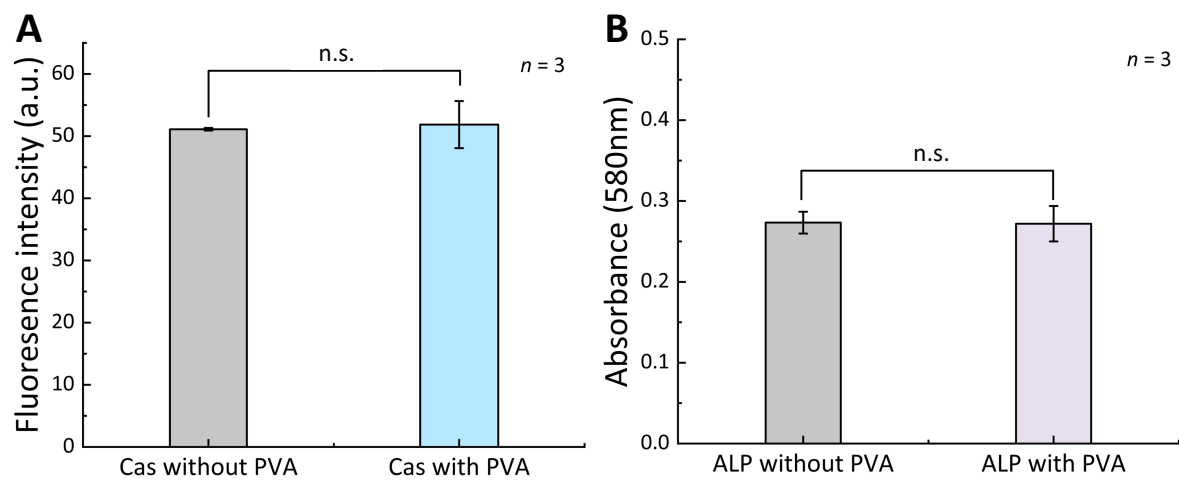

**Fig. S13** Influence of PVA residues on (A) CRISPR/Cas reaction, (B) ALP reaction.

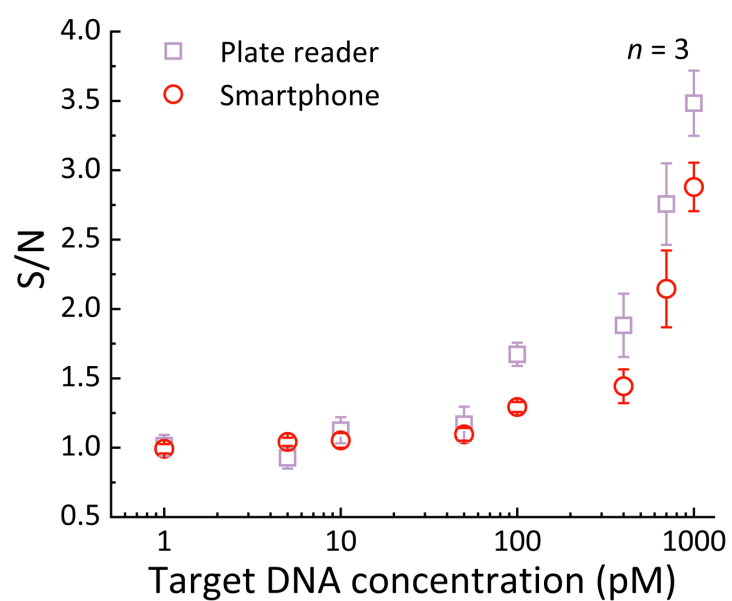

**Fig. S14** Comparison of the S/N ratio between results recorded with a microplate reader and with the smartphone setup.

**Reference:**

1 M. Matsumoto, K. Kaneko, M. Hara, M. Matsui, K. Morita and T. Maruyama, *RSC Adv.*, 2021, **11**, 23409–23417.
